# Supplementary material for: Doubly charged protonated a ions derived from small peptides
Source: Royal Society of Chemistry journal article supplement (doi:10.1039/c1cp21522a), 2011-01-01
Supplement: c1cp21522a.pdf [file c1cp21522a.pdf]

## Supporting Information

### Doubly Charged Protonated $a$ Ions Derived from Small Peptides

Irine S. Saminathan, Junfang Zhao, K. W. Michael Siu and Alan C. Hopkinson

Department of Chemistry and Centre for Research in Mass Spectrometry, York University,

4700 Keele Street, Toronto, Canada M3J 1P3

\* Phone: (416) 736-2100 ex 77839; E-mail: [ach@yorku.ca](mailto:ach@yorku.ca)

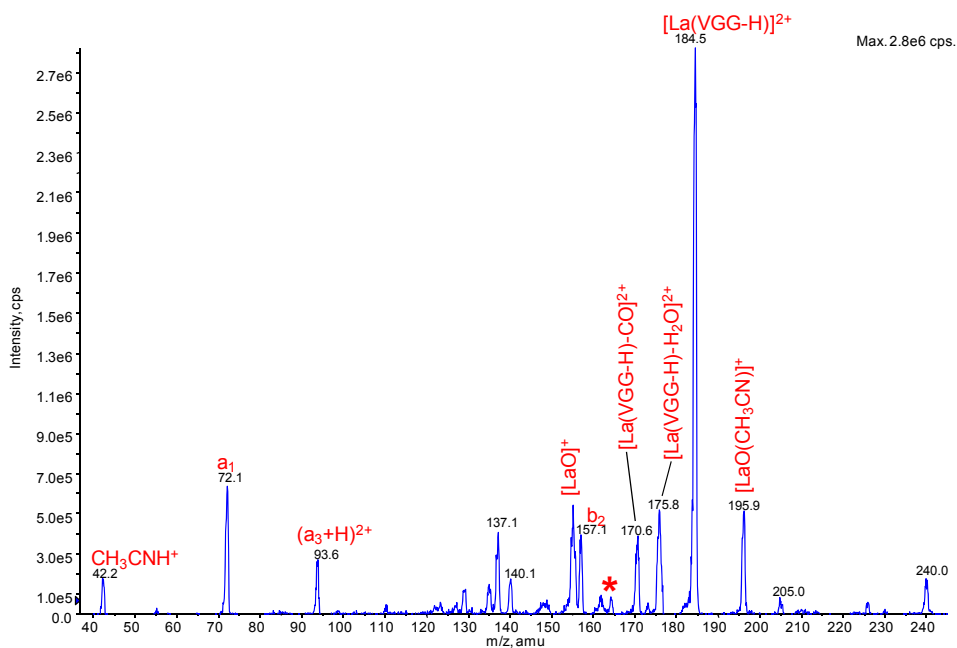

Figure S1a. CID of  $[\text{La}(\text{VGG})(\text{CH}_3\text{CN})_3]^{3+}$  ( $m/z$  164.2) at collision energy 51 eV.

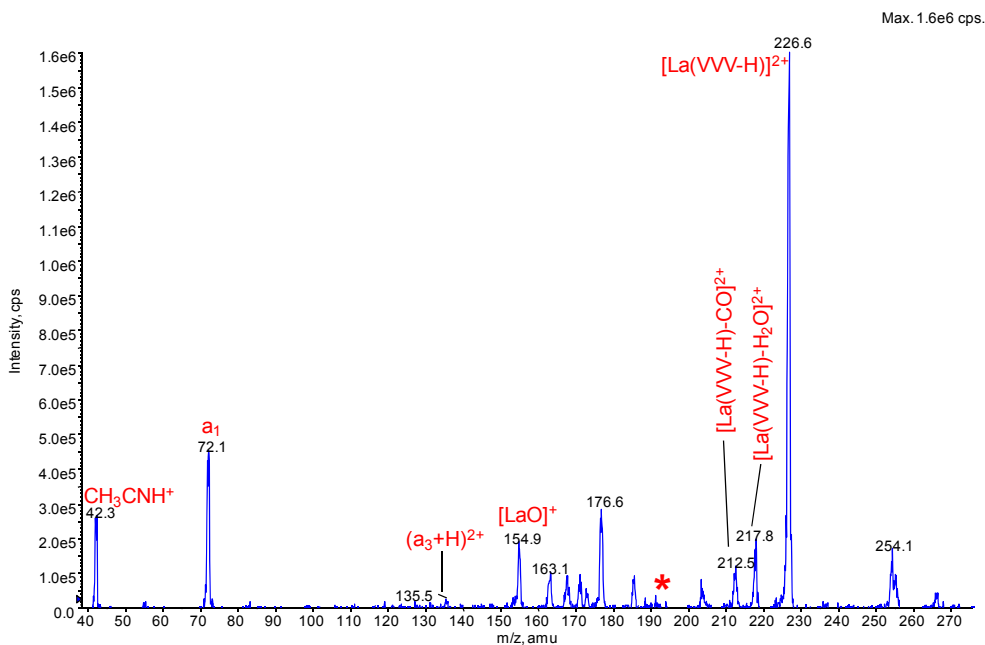

Figure S1b. CID of  $[\text{La}(\text{VVV})(\text{CH}_3\text{CN})_3]^{3+}$  ( $m/z$  192.2) at collision energy 51 eV.

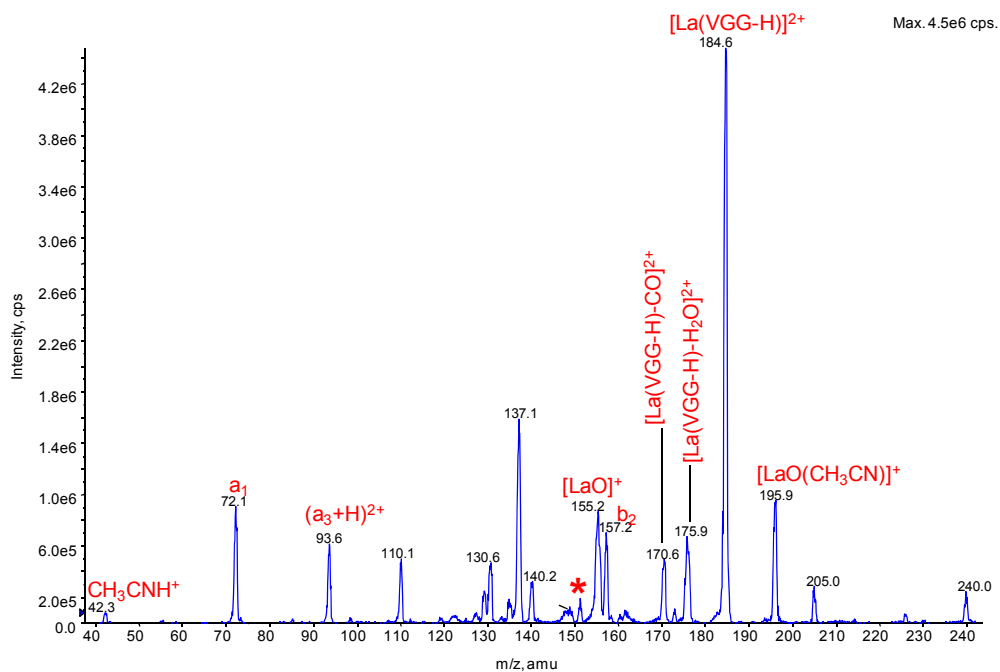

Figure S2a. CID of  $[\text{La}(\text{VGG})(\text{CH}_3\text{CN})_2]^{3+}$  ( $m/z$  150.6) at collision energy 36 eV.

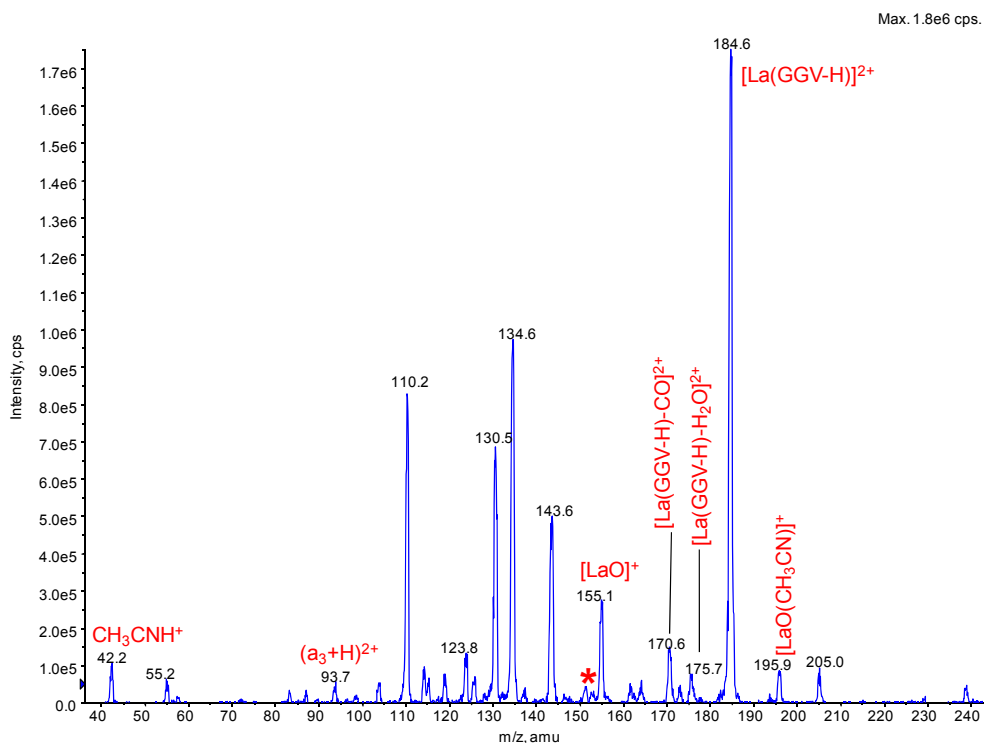

Figure S2b. CID of  $[\text{La}(\text{GGV})(\text{CH}_3\text{CN})_2]^{3+}$  ( $m/z$  150.6) at collision energy 36 eV.

Tables of total energies and Cartesian coordinates of the optimized structures at the B3LYP/6-311++G(d,p) level of theory

| <b>linear a<sub>2</sub> of GG</b> | <b>E<sub>t</sub> = -303.0743456</b> |           |           |
|-----------------------------------|-------------------------------------|-----------|-----------|
| 7                                 | -1.841974                           | -0.885410 | -0.008444 |
| 6                                 | -1.411431                           | 0.511628  | 0.010981  |
| 6                                 | 0.103181                            | 0.639700  | 0.000367  |
| 8                                 | 0.776426                            | 1.612037  | -0.007869 |
| 7                                 | 0.773001                            | -0.716860 | 0.003835  |
| 6                                 | 2.038550                            | -0.863721 | 0.001329  |
| 1                                 | -1.773622                           | 1.086752  | -0.847185 |
| 1                                 | -1.755993                           | 1.049796  | 0.899982  |
| 1                                 | 0.070662                            | -1.479388 | 0.006570  |
| 1                                 | 2.475034                            | -1.858262 | 0.004343  |
| 1                                 | 2.663588                            | 0.028539  | -0.004112 |
| 1                                 | -2.409469                           | -1.123613 | 0.797276  |
| 1                                 | -2.380598                           | -1.109874 | -0.837730 |

| <b>linear (a<sub>2</sub>+H)<sup>2+</sup> of GG</b> | <b>E<sub>t</sub> = -303.2657948</b> |           |           |
|----------------------------------------------------|-------------------------------------|-----------|-----------|
| 7                                                  | 2.360025                            | 0.080374  | 0.000241  |
| 6                                                  | 1.128249                            | -0.787586 | -0.000249 |
| 6                                                  | -0.099892                           | 0.110825  | -0.000082 |
| 8                                                  | -0.072393                           | 1.293245  | -0.000161 |
| 7                                                  | -1.411344                           | -0.599787 | 0.000059  |
| 6                                                  | -2.525769                           | 0.049534  | 0.000110  |
| 1                                                  | 2.402986                            | 0.695601  | -0.824597 |
| 1                                                  | 2.403945                            | 0.693250  | 0.826784  |
| 1                                                  | 3.211780                            | -0.498474 | -0.001071 |
| 1                                                  | 1.154205                            | -1.426721 | -0.888815 |
| 1                                                  | 1.154083                            | -1.427567 | 0.887693  |
| 1                                                  | -1.433194                           | -1.623637 | 0.000164  |
| 1                                                  | -3.466596                           | -0.498234 | 0.000290  |
| 1                                                  | -2.504356                           | 1.139080  | 0.000064  |

| <b>cyclic (a<sub>2</sub>+H)<sup>2+</sup> of GG</b> | <b>E<sub>t</sub> = -303.2661317</b> |           |           |
|----------------------------------------------------|-------------------------------------|-----------|-----------|
| 7                                                  | 1.426270                            | 0.654691  | -0.118503 |
| 6                                                  | 0.029352                            | 1.221834  | 0.096351  |
| 1                                                  | -0.045416                           | 1.676390  | 1.089810  |
| 6                                                  | -0.828702                           | -0.020182 | 0.001747  |
| 8                                                  | -2.102636                           | -0.095755 | -0.029103 |
| 7                                                  | -0.088845                           | -1.094810 | -0.030595 |
| 6                                                  | 1.349190                            | -0.860097 | 0.086559  |
| 1                                                  | 1.720514                            | -1.116172 | 1.080942  |
| 1                                                  | -0.482718                           | -2.038293 | -0.074690 |
| 1                                                  | -0.203260                           | 1.969481  | -0.665639 |
| 1                                                  | 1.915202                            | -1.377474 | -0.688450 |
| 1                                                  | 1.756708                            | 0.867352  | -1.069368 |
| 1                                                  | -2.609898                           | 0.738287  | -0.028618 |
| 1                                                  | 2.108934                            | 1.077971  | 0.524586  |

| <b>a<sub>2</sub> of PP</b> | Et= -536.6052256 |           |           |
|----------------------------|------------------|-----------|-----------|
| 7                          | -2.371738        | 0.610504  | -0.911292 |
| 6                          | -3.518567        | -0.117595 | -0.334794 |
| 6                          | -1.163420        | -0.107748 | -0.535973 |
| 6                          | -1.556954        | -1.135800 | 0.613753  |
| 6                          | -2.996311        | -0.726455 | 0.973903  |
| 6                          | -0.093976        | 0.828744  | -0.068279 |
| 7                          | 1.309807         | 0.251283  | -0.062618 |
| 6                          | 2.305849         | 0.951429  | 0.364403  |
| 6                          | 3.602121         | 0.248472  | 0.252605  |
| 6                          | 3.195349         | -1.201973 | -0.106175 |
| 6                          | 1.736088         | -1.085077 | -0.592955 |
| 8                          | -0.206921        | 1.952548  | 0.306167  |
| 1                          | -3.833569        | -0.902414 | -1.029882 |
| 1                          | -4.360094        | 0.561809  | -0.200799 |
| 1                          | -0.768198        | -0.669303 | -1.391740 |
| 1                          | -0.885414        | -1.102485 | 1.475124  |
| 1                          | -1.525367        | -2.147634 | 0.204902  |
| 1                          | -3.582174        | -1.578266 | 1.324205  |
| 1                          | -2.992744        | 0.029161  | 1.764146  |
| 1                          | 4.189359         | 0.346402  | 1.169868  |
| 1                          | 4.190062         | 0.748828  | -0.530691 |
| 1                          | 3.248566         | -1.835184 | 0.780013  |
| 1                          | 3.838141         | -1.639473 | -0.867686 |
| 1                          | 1.643182         | -1.054518 | -1.680554 |
| 1                          | 1.078530         | -1.859514 | -0.203653 |
| 1                          | -2.342786        | 1.567102  | -0.575466 |
| 1                          | 2.130312         | 1.958608  | 0.731323  |

| <b>(a<sub>2</sub>+H)<sup>2+</sup> of PP</b> | Et= -536.858153 |           |           |
|---------------------------------------------|-----------------|-----------|-----------|
| 7                                           | -2.370041       | 0.615069  | -0.850072 |
| 6                                           | -3.549525       | -0.059551 | -0.136378 |
| 6                                           | -1.120010       | -0.217204 | -0.584309 |
| 6                                           | -1.558297       | -1.259312 | 0.498226  |
| 6                                           | -2.879040       | -0.706416 | 1.065961  |
| 6                                           | -0.042065       | 0.743143  | -0.094433 |
| 7                                           | 1.329040        | 0.237872  | -0.050899 |
| 6                                           | 2.296460        | 0.971619  | 0.427812  |
| 6                                           | 3.609045        | 0.326407  | 0.323932  |
| 6                                           | 3.291351        | -1.122838 | -0.116894 |
| 6                                           | 1.834740        | -1.068523 | -0.625084 |
| 8                                           | -0.277913       | 1.856847  | 0.268805  |
| 1                                           | -2.548102       | 0.735086  | -1.851037 |
| 1                                           | -3.967205       | -0.789531 | -0.830362 |
| 1                                           | -4.295867       | 0.700482  | 0.089976  |
| 1                                           | -0.818238       | -0.696535 | -1.516070 |
| 1                                           | -0.803380       | -1.394318 | 1.273921  |
| 1                                           | -1.713047       | -2.223995 | 0.012278  |

|   |           |           |           |
|---|-----------|-----------|-----------|
| 1 | -3.497858 | -1.497738 | 1.489677  |
| 1 | -2.699660 | 0.029791  | 1.853864  |
| 1 | 4.171259  | 0.420533  | 1.260376  |
| 1 | 4.199515  | 0.902460  | -0.409818 |
| 1 | 3.373723  | -1.800495 | 0.732972  |
| 1 | 3.967278  | -1.477593 | -0.892601 |
| 1 | 1.760147  | -1.001282 | -1.712763 |
| 1 | 1.218938  | -1.891652 | -0.266361 |
| 1 | -2.213847 | 1.555333  | -0.457274 |
| 1 | 2.080708  | 1.960134  | 0.826598  |

| <b>a<sub>3</sub> of GGG</b> | <b>E<sub>r</sub> = -511.1637153</b> |           |           |
|-----------------------------|-------------------------------------|-----------|-----------|
| 7                           | 3.328879                            | -0.612255 | -0.578381 |
| 6                           | 2.714372                            | 0.647930  | -0.169229 |
| 6                           | 1.258010                            | 0.470214  | 0.238841  |
| 8                           | 0.577412                            | 1.435536  | 0.633832  |
| 7                           | 0.771328                            | -0.777984 | 0.124560  |
| 6                           | -0.479150                           | -1.245029 | 0.706853  |
| 6                           | -1.738852                           | -0.734287 | 0.022211  |
| 7                           | -1.787940                           | 0.760413  | -0.032514 |
| 6                           | -2.818885                           | 1.375497  | -0.462096 |
| 1                           | 4.083740                            | -0.893533 | 0.035421  |
| 1                           | 3.693615                            | -0.577130 | -1.522204 |
| 1                           | 3.214739                            | 1.110677  | 0.687112  |
| 1                           | 2.729633                            | 1.396739  | -0.966165 |
| 1                           | -0.509211                           | -2.331759 | 0.661978  |
| 1                           | -0.543150                           | -0.942064 | 1.761137  |
| 8                           | -2.647792                           | -1.372030 | -0.394392 |
| 1                           | -0.861217                           | 1.236882  | 0.316761  |
| 1                           | 1.460423                            | -1.449415 | -0.220837 |
| 1                           | -2.824119                           | 2.461257  | -0.481386 |
| 1                           | -3.680252                           | 0.803128  | -0.802479 |

| <b>(a<sub>3</sub>+H)<sup>2+</sup> of GGG</b> | <b>E<sub>r</sub> = -511.4026113</b> |           |           |
|----------------------------------------------|-------------------------------------|-----------|-----------|
| 7                                            | -4.141573                           | 0.018789  | -0.000252 |
| 6                                            | -2.887705                           | 0.855219  | -0.000191 |
| 6                                            | -1.719801                           | -0.153641 | 0.000086  |
| 8                                            | -1.970366                           | -1.347279 | -0.000164 |
| 7                                            | -0.465529                           | 0.346944  | 0.000475  |
| 6                                            | 0.669224                            | -0.559030 | 0.000541  |
| 6                                            | 1.947814                            | 0.228904  | 0.000095  |
| 7                                            | 3.191386                            | -0.631043 | -0.000121 |
| 6                                            | 4.364561                            | -0.110259 | -0.000421 |
| 1                                            | -4.725239                           | 0.173805  | -0.827091 |
| 1                                            | -4.724750                           | 0.173020  | 0.827092  |
| 1                                            | -2.875576                           | 1.488627  | -0.887462 |
| 1                                            | -2.875774                           | 1.488798  | 0.886971  |
| 1                                            | 0.648656                            | -1.217625 | 0.880512  |

|   |           |           |           |
|---|-----------|-----------|-----------|
| 1 | 0.648094  | -1.218222 | -0.878904 |
| 8 | 2.080346  | 1.404296  | -0.000013 |
| 1 | 3.093361  | -1.648973 | -0.000087 |
| 1 | -0.286896 | 1.344599  | 0.000771  |
| 1 | 5.243045  | -0.750689 | -0.000628 |
| 1 | 4.452767  | 0.975006  | -0.000462 |
| 1 | -3.812066 | -0.974457 | -0.000669 |

| <b>a<sub>3</sub> of PPP</b> | <b>Et=-861.4506734</b> |           |           |
|-----------------------------|------------------------|-----------|-----------|
| 6                           | 2.855776               | 2.117472  | -0.396195 |
| 6                           | 2.572097               | 1.500389  | 0.970519  |
| 6                           | 0.634660               | 1.082223  | -0.531323 |
| 7                           | -1.859430              | 0.583270  | -0.411951 |
| 6                           | -3.247711              | 1.055669  | -0.167028 |
| 6                           | -4.091969              | -0.193049 | -0.403716 |
| 6                           | -3.200045              | -1.320554 | 0.133212  |
| 6                           | -1.783260              | -0.909706 | -0.305082 |
| 6                           | -0.691670              | -1.177268 | 0.729928  |
| 8                           | -0.783764              | -0.740559 | 1.866955  |
| 7                           | 0.524826               | -1.619653 | 0.256458  |
| 6                           | 1.696832               | -0.936505 | 0.754743  |
| 6                           | 0.809234               | -2.442217 | -0.937204 |
| 6                           | 2.313364               | -2.693451 | -0.786568 |
| 6                           | 2.830260               | -1.372400 | -0.186697 |
| 6                           | -0.850908              | 1.484613  | -0.229478 |
| 8                           | -1.069754              | 2.637272  | 0.103527  |
| 6                           | 1.458252               | 2.291258  | -1.005759 |
| 7                           | 1.372473               | 0.587977  | 0.745657  |
| 1                           | 3.378994               | 3.068448  | -0.291868 |
| 1                           | 3.488146               | 1.464235  | -1.000765 |
| 1                           | 2.262099               | 2.256747  | 1.691905  |
| 1                           | 3.386853               | 0.918126  | 1.398569  |
| 1                           | 0.679143               | 0.264018  | -1.245212 |
| 1                           | -3.471960              | 1.882944  | -0.839788 |
| 1                           | -3.331176              | 1.422166  | 0.860190  |
| 1                           | -4.288408              | -0.327875 | -1.470887 |
| 1                           | -5.051816              | -0.141983 | 0.110413  |
| 1                           | -3.465114              | -2.307267 | -0.248282 |
| 1                           | -3.239494              | -1.347586 | 1.224493  |
| 1                           | -1.532083              | -1.340177 | -1.276635 |
| 1                           | 1.898118               | -1.148390 | 1.805773  |
| 1                           | 0.587843               | -1.909781 | -1.870339 |
| 1                           | 0.218104               | -3.357289 | -0.912928 |
| 1                           | 2.793600               | -2.934677 | -1.734488 |
| 1                           | 2.487124               | -3.522521 | -0.097508 |
| 1                           | 2.972491               | -0.640161 | -0.983746 |
| 1                           | 3.777798               | -1.481946 | 0.339534  |
| 1                           | 1.473886               | 2.342510  | -2.094913 |

|   |          |          |           |
|---|----------|----------|-----------|
| 1 | 0.983658 | 3.198403 | -0.631068 |
| 1 | 0.725780 | 0.688345 | 1.536427  |

| $(a_3+H)^{2+}$ of PPP | $E_i = -861.7260259$ |           |           |
|-----------------------|----------------------|-----------|-----------|
| 6                     | -3.532440            | -2.141180 | 1.235354  |
| 6                     | -4.391195            | -1.693566 | 0.056534  |
| 6                     | -2.111410            | -0.732625 | -0.153708 |
| 7                     | -0.738583            | 1.383444  | -0.074668 |
| 6                     | -0.620896            | 2.858152  | -0.234345 |
| 6                     | 0.372742             | 3.226930  | 0.859819  |
| 6                     | 1.362509             | 2.051103  | 0.869947  |
| 6                     | 0.502387             | 0.804509  | 0.442900  |
| 6                     | 1.221949             | -0.006229 | -0.632826 |
| 8                     | 0.838215             | -0.204450 | -1.741648 |
| 7                     | 2.556617             | -0.575375 | -0.253030 |
| 6                     | 3.390245             | -0.956538 | -1.170162 |
| 6                     | 3.064737             | -0.874042 | 1.135067  |
| 6                     | 4.542824             | -1.245243 | 0.891717  |
| 6                     | 4.628481             | -1.539951 | -0.625450 |
| 1                     | -4.119432            | -2.220365 | 2.150469  |
| 1                     | -3.086784            | -3.120694 | 1.040593  |
| 1                     | -5.081637            | -0.895405 | 0.328788  |
| 1                     | -4.940713            | -2.486673 | -0.447013 |
| 1                     | -1.309019            | -1.363314 | -0.534662 |
| 1                     | -3.185073            | -1.723377 | -1.693441 |
| 1                     | -1.602582            | 3.311551  | -0.121118 |
| 1                     | -0.249394            | 3.091562  | -1.236820 |
| 1                     | -0.137348            | 3.303938  | 1.822443  |
| 1                     | 0.874035             | 4.175172  | 0.667123  |
| 1                     | 1.823144             | 1.902938  | 1.845792  |
| 1                     | 2.159452             | 2.225745  | 0.141818  |
| 1                     | 3.126834             | -0.845836 | -2.218579 |
| 1                     | 2.469829             | -1.701538 | 1.528449  |
| 1                     | 2.934323             | -0.003956 | 1.773171  |
| 1                     | 4.844895             | -2.096810 | 1.498382  |
| 1                     | 5.191070             | -0.407172 | 1.148395  |
| 1                     | 4.628156             | -2.613296 | -0.873280 |
| 1                     | 5.512764             | -1.133092 | -1.126451 |
| 1                     | -1.574261            | -1.380575 | 1.877221  |
| 1                     | -2.849045            | -0.159803 | 1.816124  |
| 6                     | -1.879399            | 0.767264  | -0.458250 |
| 8                     | -2.799585            | 1.372219  | -0.996606 |
| 6                     | -2.452562            | -1.050471 | 1.321867  |
| 7                     | -3.380517            | -1.091456 | -0.916786 |
| 1                     | 0.318105             | 0.154440  | 1.305857  |
| 1                     | -3.706808            | -0.180562 | -1.306629 |
